# Supplementary material
Source: publisher figshare collection journal article supplement (https://rs.figshare.com/ndownloader/files/23589433)
Supplement: Supplementary file 1 [file 23589433]

## Sheet: Metadata
	Table S5. Physiological and climatic data for matched localities
	Data are from Sunday et al. (2014)
	Species are arranged into each of two groups (amphibians, squamatess). Within groups, species are arranged alphabetically by by genus and species names.
	Data are given on critical thermal minimum (CTmin) and critical thermal maximum (CTmax) annual mean temperature (Bio1), maximum annual temperature (Bio5), and minimum annual temperature (Bio6).

## Sheet: Amphibians
Species	CTMax	CTMin	Bio1	Bio5	Bio6
Acris_crepitans	NA	-1	20.3	32.8	5.7
Adelotus_brevis	31.2	NA	17.2	26.4	5.8
Ambystoma_jeffersonianum	34	NA	11.5	30.4	-6
Ambystoma_macrodactylum	34.4	NA	5	26.2	-10.5
Ambystoma_maculatum	38.5	NA	15.2	33.3	-3.4
Assa_darlingtoni	31	NA	14.8	23.6	5.2
Bufo_alvarius	39.9	2.5	20.2	38	2.3
Bufo_boreas	36.5	NA	4.9	21.3	-7.4
Bufo_canaliferus	37.3	9.5	19.5	27	12.2
Bufo_canorus	38	-2	0.9	17	-10.9
Bufo_coccifer	NA	2.8	20.4	26.6	14.6
Bufo_cognatus	41.3	-4	20.2	38	2.3
Bufo_debilis	40.1	2.5	21.3	34.9	8.3
Bufo_exsul	37.1	-4	12.5	30.1	-5.3
Bufo_haematiticus	37.5	9.5	20	26.4	13.9
Bufo_luetkenii	NA	7.8	23.3	32	15.1
Bufo_marinus	41.8	11	26.5	31.4	22.2
Bufo_marmoreus	40.2	7.8	27.2	34.5	19.7
Bufo_mazatlanensis	39.9	5	21.3	34.9	8.3
Bufo_nelsoni	36.2	NA	16.3	37.7	-2.4
Bufo_woodhousii	41.1	NA	9.7	26.5	-6.6
Craugastor_fitzingeri	NA	8	26.5	31.4	22.2
Craugastor_fleischmanni	31.4	6	10.9	15.5	5.9
Crinia_parinsignifera	30.5	NA	18.5	33.6	3.8
Crinia_signifera	34.9	NA	3.3	15.6	-6.2
Cyclorana_alboguttata	33.8	NA	22.8	32.5	10.6
Dendrobates_auratus	34.8	9.5	26.3	32	21
Dendropsophus_labialis	38.6	NA	10.1	15.7	4.7
Desmognathus_fuscus	35	-2.3	10.3	29.4	-8.7
Desmognathus_ochrophaeus	31.5	NA	8.6	24.6	-8.1
Desmognathus_quadramaculatus	31.4	NA	8.6	24.6	-8.1
Eleutherodactylus_coqui	37.1	7.5	22.9	28.8	16.4
Eleutherodactylus_portoricensis	36.3	7.5	22.9	28.8	16.4
Engystomops_pustulosus	NA	6	26.5	31.4	22.2
Eurycea_bislineata	35	-2	10.3	29.4	-8.7
Eurycea_longicauda	37.6	NA	14.2	32.4	-4.8
Eurycea_lucifuga	37.2	NA	14.2	32.4	-4.8
Eurycea_multiplicata	37.5	NA	15.3	33.3	-3.2
Eurycea_nana	37.2	NA	19.6	35	2.8
Gastrophryne_olivacea	NA	2.5	20.2	38	2.3
Geocrinia_victoriana	29.5	NA	6	18.8	-2.4
Hyla_chrysoscelis	NA	2.1	17.1	32.3	0.4
Hyla_cinerea	NA	4.7	17.1	32.3	0.4
Hyla_gratiosa	NA	5.1	17.1	32.3	0.4
Hyla_squirella	NA	-1	20.3	32.8	5.7
Hyla_walkeri	38.1	-2.2	15.1	23.4	5.8
Hypopachus_variolosus	NA	2.5	20.2	38	2.3
Leptodactylus_melanonotus	39.8	5	19.8	35.4	3.9
Leptodactylus_pentadactylus	NA	6	26.5	31.4	22.2
Limnodynastes_dorsalis	36.5	NA	16.6	30.6	2.3
Limnodynastes_fletcheri	28.3	NA	18.5	33.6	3.8
Limnodynastes_peronii	32.7	NA	17.2	26.4	5.8
Limnodynastes_tasmaniensis	33.4	NA	13.4	26.3	0
Litoria_aurea	36.2	NA	13.3	23.8	4.6
Litoria_bicolor	41.4	NA	23.7	31.2	14
Litoria_caerulea	39.3	NA	24	32	13.3
Litoria_chloris	38.3	NA	20.6	29.2	10.7
Litoria_citropa	30.7	NA	18.6	28.7	6.1
Litoria_ewingii	32.8	NA	12.9	25.7	-0.3
Litoria_fallax	41.6	NA	23.7	31.2	14
Litoria_freycineti	31.3	NA	16.4	26	4.9
Litoria_gracilenta	38.3	NA	20.6	29.2	10.7
Litoria_lesueurii	34.5	NA	14.3	25.8	3.7
Litoria_peronii	36.2	NA	12.9	25.7	-0.3
Litoria_phyllochroa	30	NA	13.5	25.4	2.8
Litoria_rothii	39.4	NA	23.7	31.2	14
Litoria_rubella	41.6	NA	20.6	29.2	10.7
Litoria_verreauxii	32	NA	14.3	25.8	3.7
Mixophyes_fasciolatus	30.5	NA	17.2	26.4	5.8
Neobatrachus_pictus	29.3	NA	16.6	30.6	2.3
Notophthalmus_viridescens	37.3	NA	8.6	24.6	-8.1
Paa_spinosa	42.1	NA	20.8	33.9	6.4
Pachymedusa_dacnicolor	28.8	2.5	25.8	33.8	15.5
Philoria_sphagnicolus	25.8	NA	18.6	28.7	6.1
Plethodon_glutinosus	34.5	NA	-5.1	15.4	-27
Pseudacris_regilla	37.7	-1	4.9	21.3	-7.4
Pseudacris_triseriata	38.1	NA	1.6	22.1	-15.2
Pseudophryne_bibronii	34.8	NA	13.4	26.3	0
Rana_boylii	34	NA	6.9	24.1	-4.2
Rana_cascadae	33.6	-1	5.3	24.9	-8.3
Rana_catesbeiana	33.6	NA	12.2	29.3	-4
Rana_clamitans	35	NA	12.2	29.3	-4
Rana_palmipes	36.9	-1	20	26.4	13.9
Rana_palustris	31.3	NA	12.2	29.3	-4
Rana_pipiens	35.2	-1.6	15.1	23.4	5.8
Rana_pretiosa	34.8	-1	4.3	22.8	-12.3
Rana_sylvatica	36	0.5	6.5	25.3	-12.4
Rana_virgatipes	38	NA	11.7	29.7	-5.5
Rana_warszewitschii	32.8	4.8	10.9	15.5	5.9
Scaphiopus_holbrookii	34	NA	12.2	29.3	-4
Smilisca_baudinii	40.4	5	21.8	32.3	11.8
Smilisca_fodiens	39.5	6.5	22.1	36.1	8.1
Smilisca_phaeota	NA	2.8	20.3	32.8	5.7
Spea_hammondii	40.3	0	20.2	38	2.3
Taricha_torosa	38	NA	18.3	34.6	5
Tlalocohyla_smithii	42.5	5	25.4	33.4	14.9

## Sheet: Squamates
Species	CTMax	CTMin	Bio1	Bio5	Bio6
Anolis_carolinensis	41.3	9.8	20.3	32.8	5.7
Anolis_cooki	38.9	NA	26.2	32.9	18.5
Anolis_cristatellus	38.1	NA	23.3	29.7	16.1
Anolis_cupreus	38.4	11.8	22.6	30.5	15.9
Anolis_cybotes	39	NA	22.3	30.2	14.1
Anolis_gundlachi	35.7	NA	23.3	29.7	16.1
Anolis_humilis	35.6	12.4	26	32.2	20.7
Anolis_intermedius	38.4	11.1	22.6	30.5	15.9
Anolis_lemurinus	37.3	12.9	26	32.2	20.7
Anolis_limifrons	36.8	12.3	26	32.2	20.7
Anolis_lionotus	36.7	14.7	26	32.2	20.7
Anolis_shrevei	40.1	NA	11.5	19	3.1
Anolis_tropidogaster	33.1	9.5	22.6	30.5	15.9
Aspidoscelis_tigris	45.1	10.5	10.6	33.6	-6.3
Chamaeleo_dilepis	43.6	7.6	23.2	32	15.3
Charina_bottae	38	NA	11.2	27.4	0.9
Ctenotus_regius	45.1	8.7	16.7	31.8	4.6
Ctenotus_taeniolatus	44.7	11.4	16.3	30.5	4.9
Ctenotus_uber	45.5	9.1	16.3	30.5	4.9
Eremias_argus	43	8	13	31.8	-8.3
Eremias_brenchleyi	40.8	5.1	15.7	32.4	-2.9
Eremias_multiocellata	41	9	4	26.1	-19.5
Eremiascincus_fasciolatus	41.2	9	22	37.4	6.1
Eremiascincus_richardsonii	42	7.3	16.3	30.5	4.9
Hemachatus_haemachatus	43.1	3.7	15.8	25.6	2.5
Holcosus_festivus	43.7	15.5	26	32.2	20.7
Lepidophyma_flavimaculatum	38	11.3	26	32.2	20.7
Liolaemus_abaucan	47.3	15.41	11.1	22.6	-1.5
Liolaemus_albiceps	44.33	7.05	6.3	18.5	-8.6
Liolaemus_bellii	NA	3.99	14.3	29	2.7
Liolaemus_bibronii	44.53	8.49	11.4	25.8	-0.2
Liolaemus_boulengeri	43.99	9.4	13.3	27.4	1.3
Liolaemus_canqueli	44.6	6.99	11.4	25.7	-0.1
Liolaemus_capillitas	43.7	7.47	15.1	30.3	-0.5
Liolaemus_chacoensis	44.1	14.9	17.2	32.6	0.4
Liolaemus_chiliensis	NA	3.68	14.3	29	2.7
Liolaemus_cuyanus	45.7	12	18.4	33.9	0.3
Liolaemus_darwinii	44.68	10.11	16.7	32.2	0.6
Liolaemus_elongatus	45.1	7.68	7.7	23.3	-4.4
Liolaemus_fabiani	NA	11.33	4.7	14.5	-6
Liolaemus_fitzingerii	44.45	8.24	12.4	26.4	0.1
Liolaemus_fuscus	NA	3.9	14.3	29	2.7
Liolaemus_irregularis	44.98	6.96	7.5	19.6	-7.4
Liolaemus_kingii	44.5	7.01	9.4	22.2	-0.8
Liolaemus_koslowskyi	46.1	13.22	19.6	34.7	2.1
Liolaemus_kriegi	43.67	7.6	7.5	23	-4.5
Liolaemus_laurenti	46.18	12.2	17.3	32.8	1.1
Liolaemus_lemniscatus	NA	5.95	14.3	29	2.7
Liolaemus_leopardinus	NA	3.3	14.3	29	2.7
Liolaemus_melanops	44.94	5.65	13.7	25.8	3.1
Liolaemus_monticola	NA	4.54	14.3	29	2.7
Liolaemus_multicolor	44.7	8.06	6.6	18.7	-8.4
Liolaemus_multimaculatus	43.83	8.93	13.6	26.7	3.9
Liolaemus_nigroviridis	NA	2.63	14.3	29	2.7
Liolaemus_nitidus	NA	3.6	14.3	29	2.7
Liolaemus_olongasta	44.58	11.85	16.6	32.1	0.1
Liolaemus_petrophilus	45.23	7.31	7.3	22.9	-5.2
Liolaemus_pseudoanomalus	45.93	12.19	17.2	32.6	0.4
Liolaemus_quilmes	44.69	8.46	10.3	22.2	-2.8
Liolaemus_riojanus	45.2	10.7	16.3	32	0
Liolaemus_robertmertensi	43	14.07	19	34.4	1.7
Liolaemus_rothi	43.8	5.5	10	26.2	-3.2
Liolaemus_scapularis	45.57	9.39	10.3	22.2	-2.8
Liolaemus_schroederi	NA	5.4	14.3	29	2.7
Liolaemus_telsen	44.6	8.98	13.3	27.4	1.3
Liolaemus_tenuis	NA	4.16	14.3	29	2.7
Liolaemus_xanthoviridis	44.48	7.86	12.2	25.7	0.2
Liopholis_striata	44.2	6.1	16.3	30.5	4.9
Oligosoma_maccanni	NA	3.3	8.1	18.8	-1.6
Phrynosoma_cornutum	47.91	9.46	16.3	35	-2.7
Phrynosoma_douglasii	43.5	2.75	7.4	22.6	-6.8
Phymaturus_patagonicus	39.9	9.8	7.1	21.1	-2.9
Platysaurus_intermedius	44.8	8.9	21.1	30.1	9
Plestiodon_elegans	41.9	9.3	16.8	33.4	0.9
Plestiodon_gilberti	42.3	7.7	7.6	24.2	-4.4
Protobothrops_mucrosquamatus	38.6	3.5	22	31.8	12.5
Pseudocordylus_melanotus	NA	10.17	15.6	27.2	-0.7
Sceloporus_graciosus	44.7	4.8	18.2	34.1	4.8
Sceloporus_jarrovii	NA	-3.7	12.2	29.8	-3.5
Sceloporus_malachiticus	42.8	9.7	25.8	34.1	18.9
Sceloporus_occidentalis	44.1	4.8	18.2	34.1	4.8
Sceloporus_undulatus	40.4	11.4	17.1	33.2	0.3
Sceloporus_variabilis	43.1	10.2	22.6	30.5	15.9
Sphaerodactylus_gaigeae	38.2	NA	24.2	30.4	17.1
Sphaerodactylus_klauberi	36.3	NA	23.3	29.6	16.1
Sphaerodactylus_macrolepis	39.5	NA	26.2	32.9	18.5
Sphaerodactylus_nicholsi	40.5	NA	26.2	32.9	18.5
Sphaerodactylus_roosevelti	39.5	NA	26.2	32.9	18.5
Stellagama_stellio	44.7	11.9	9.6	22.9	-2.6
Takydromus_formosanus	NA	4.5	21.9	31.9	12.1
Takydromus_hsuehshanensis	NA	2	21.9	30.5	12
Takydromus_septentrionalis	44.5	4.9	16.5	30.6	2.4
Takydromus_sexlineatus	43.2	6.4	21.1	34.7	6.6
Takydromus_stejnegeri	NA	5	21.9	31.9	12.1
Tarentola_boettgeri	41.6	5.3	14.6	24.5	7.1
Thamnophis_ordinoides	38.3	3.8	11.5	26.7	1
Thamnophis_sirtalis	39.2	3.4	11.5	26.7	1
Trapelus_savignii	47.2	12	19.3	32.6	6.4
Trimeresurus_gracilis	38.3	3.7	22.5	31.3	12.5
Trioceros_bitaeniatus	42.2	4.4	20.1	28.7	12.4
Trioceros_ellioti	41.8	3.5	21.7	30.7	13.5
Trioceros_hoehnelii	40.8	5.1	17.8	26.4	10
Trioceros_jacksonii	40	5.3	17.8	26.4	10
Trioceros_schubotzi	41.6	1.4	2.1	9.6	-3.7
Uromastyx_ornata	43.3	NA	10.2	27.5	-5.1
Uta_stansburiana	43.7	7.8	1.6	21.5	-14.3
Woodworthia_maculatus	NA	1.2	8.1	18.8	-1.6
Xantusia_riversiana	39	6.6	16.9	27.8	6.5
Xantusia_vigilis	41.6	6.9	18.2	34.1	4.8
Zootoca_vivipara	44.1	2.2	2.9	16	-9
